# Supplementary material for: Effect of interactions with the chaperonin cavity on protein folding and misfolding
Source: Royal Society of Chemistry journal article supplement (doi:10.1039/c3cp52872c), 2013-09-27
Supplement: c3cp52872c.pdf [file c3cp52872c.pdf]

# Supporting Information For: Effect of interactions with the chaperonin cavity on protein folding and misfolding<sup>†</sup>

Anshul Sirur,<sup>a</sup> Michael Knott,<sup>a</sup> and Robert B. Best<sup>\*a,b</sup>

**Table S1** Parameters for fit of phenomenological model to rates and stabilities. Cavity size is given below each protein name.

| Protein:                    | NTL9   | prb <sub>7-53</sub> | Protein G |
|-----------------------------|--------|---------------------|-----------|
| Cavity:                     | 2.4 nm | 2.8 nm              | 2.6 nm    |
| $A_F$                       | 0.46   | 0.29                | 0.15      |
| $n_F^0$                     | 9.8    | 26                  | 27        |
| $\kappa_F / k_B T$          | 0.2    | 10                  | 30        |
| $A_{\ddagger}$              | 13     | 0.38                | 8.3       |
| $n_{\ddagger}^0$            | 2.8    | 12                  | 8.2       |
| $\kappa_{\ddagger} / k_B T$ | 0.053  | 0.030               | 0.020     |
| $B_U / k_B T$               | 14     | 34                  | 58        |
| Cavity:                     | 2.8 nm | 3.0 nm              | 2.8 nm    |
| $A_F$                       | 1.3    | 1.5                 | 0.026     |
| $n_F^0$                     | 24     | 19                  | 27        |
| $\kappa_F / k_B T$          | 0.2    | 10                  | 30        |
| $A_{\ddagger}$              | 0.92   | 0.7                 | 56        |
| $n_{\ddagger}^0$            | 7.9    | 8.7                 | 5         |
| $\kappa_{\ddagger} / k_B T$ | 0.073  | 0.054               | 0.016     |
| $B_U / k_B T$               | 20     | 23                  | 40        |
| Cavity:                     | 3.2 nm | 3.2 nm              | 3.0 nm    |
| $A_F$                       | 2.9    | 2.72                | 0.55      |
| $n_F^0$                     | 12     | 29                  | 14        |
| $\kappa_F / k_B T$          | 0.2    | 10                  | 30        |
| $A_{\ddagger}$              | 1.2    | .37                 | 2.8       |
| $n_{\ddagger}^0$            | 9.6    | 12                  | 0.29      |
| $\kappa_{\ddagger} / k_B T$ | 0.086  | 0.027               | 0.0020    |
| $B_U / k_B T$               | 24     | 38                  | 40        |

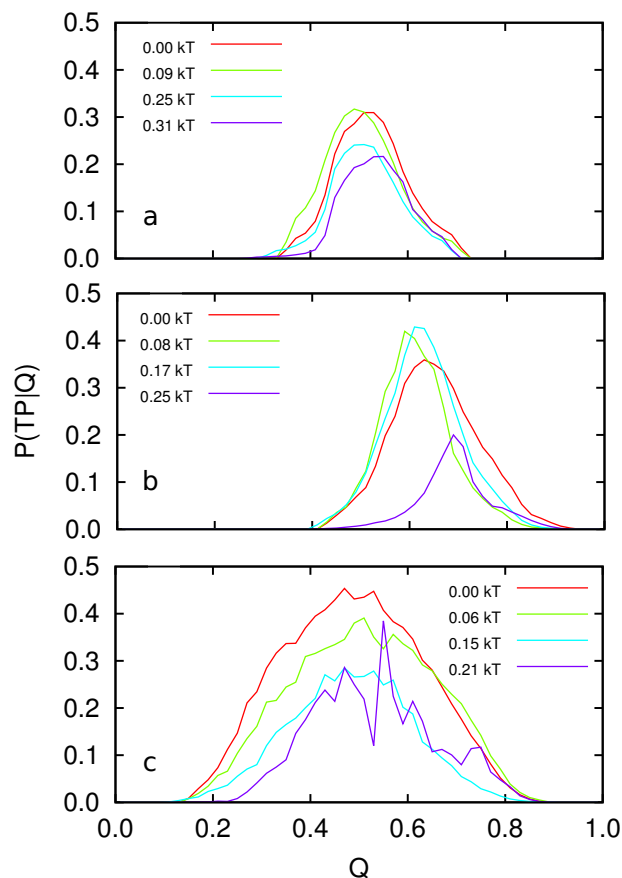

**Fig. S1** Effects of confinement on the location of the folding barrier along  $Q$ , given by  $P(TP|Q)$  for (a) 1div, (b) prb and (c) protein G.

<sup>a</sup> Cambridge University, Department of Chemistry, Lensfield Road Cambridge CB2 1EW, United Kingdom.

<sup>b</sup> Laboratory of Chemical Physics, National Institute of Diabetes and Digestive and Kidney Diseases, National Institutes of Health, Bethesda, MD 20892-0520, United States. Fax: +1-301-496-0825; Tel: +1-301-496-5414; E-mail: robertbe@helix.nih.gov
